# Supplementary material for: The cauldron has cooled down: a systematic literature review on home advantage in football during the COVID-19 pandemic from a socio-economic and psychological perspective
Source: Springer Nature journal article supplement (doi:10.1007/s11301-021-00254-5), 2022-01-04

Included studies and individual characteristics (sorted by year and authors)

| Year / Authors          | Journal; Platform / Status       | Title                                                         | Number of countries | Number of analyzed leagues | Analyzed leagues and (Tiers)                                                                                                                                                                                                                                                                                                                                                                                                                 | League comparison | Number of analyzed seasons | Analyzed factors                 | Results evaluation |
|-------------------------|----------------------------------|---------------------------------------------------------------|---------------------|----------------------------|----------------------------------------------------------------------------------------------------------------------------------------------------------------------------------------------------------------------------------------------------------------------------------------------------------------------------------------------------------------------------------------------------------------------------------------------|-------------------|----------------------------|----------------------------------|--------------------|
| 2020 / Cross J; Uhrig R | SSRN / not peer-reviewed yet     | Do Fans Impact Sports Outcomes? A COVID-19 Natural Experiment | 4                   | 4                          | England (1); Germany (1); Italy (1); Spain (1)                                                                                                                                                                                                                                                                                                                                                                                               | Across            | 11 (2009 - 2019)           | Win ratio; Goals; Expected goals | No                 |
| 2020 / Cueva C          | Econstor / not peer-reviewed yet | Animal Spirits in the Beautiful Game                          | 30                  | 41                         | England (1, 2, 3, 4, 5); Spain (1, 2); Italy (1, 2); France (1, 2); Germany (1, 2); Turkey (1); Portugal (1); Belgium (1); Greece (1); Scotland (1); Brazil (1); USA (1); Mexico (1); Japan (1); Poland (1); Romania (1); Sweden (1); Norway (1); Russia (1); Denmark (1); Finland (1); Ireland (1); China (1); South Korea (1); Austria (1); Switzerland (1); Bulgaria (1); Hungary (1); Netherlands (1); Scotland (1, 2, 3); Argentina (1) | Across            | 27 (1994 - 2020)           | Win ratio; Fouls; Cards          | Yes                |

|                                 |                                    |                                                                                           |   |   |                                                            |            |                 |                                                                                                                                          |     |
|---------------------------------|------------------------------------|-------------------------------------------------------------------------------------------|---|---|------------------------------------------------------------|------------|-----------------|------------------------------------------------------------------------------------------------------------------------------------------|-----|
| 2020 / Dilger A; Vischer L      | Econstor / not peer-reviewed yet   | No home bias in ghost games                                                               | 1 | 1 | Germany (1)                                                | N/A        | 1 (2019)        | Win ratio; points; goals; market value; extra time; shots; distance covered; passes; possession; tackles; fouls; yellow cards; red cards | Yes |
| 2020 / Endrich M; Gesche T      | Economics Letters / peer-reviewed  | Home-bias in referee decisions: Evidence from "Ghost Matches" during the Covid19-Pandemic | 1 | 2 | Germany (1, 2)                                             | N/A        | 1 (2019)        | Fouls; Cards                                                                                                                             | No  |
| 2020 / Ferraresi M; Gucciardi G | Econpapers / not peer-reviewed yet | Team performance and audience: experimental evidence from the football sector             | 5 | 5 | France (1); Germany (1); Italy (1); Spain (1); England (1) | Across     | 1 (2019)        | Win ratio; Points                                                                                                                        | No  |
| 2020 / Krawczyk M; Strawinski P | Econpapers / not peer-reviewed yet | Home advantage revisited. Did COVID level the playing fields?                             | 4 | 4 | England (1); Germany (1); Italy (1); Spain (1)             | Individual | 3 (2017 - 2019) | Win ratio; Points, Goals                                                                                                                 | Yes |

|                                                                               |                                                                                   |                                                                                                                             |   |   |                                                              |                     |                 |                                                                                                                          |     |
|-------------------------------------------------------------------------------|-----------------------------------------------------------------------------------|-----------------------------------------------------------------------------------------------------------------------------|---|---|--------------------------------------------------------------|---------------------|-----------------|--------------------------------------------------------------------------------------------------------------------------|-----|
| 2020 / Matos R; Monteiro D; Antunes R; Mendes D; Botas J; Clemente J; Amaro N | International Journal of Environmental Research and Public Health / peer-reviewed | Home-Advantage during COVID-19: An Analysis in Portuguese Football League                                                   | 1 | 1 | Portugal (1)                                                 | N/A                 | 4 (2016 - 2019) | Points                                                                                                                   | Yes |
| 2020 / Sors F; Grassi M; Agostini T; Murgia M                                 | European Journal of Sport Science / peer-reviewed                                 | The sound of silence in association football: Home advantage and referee bias decrease in matches played without spectators | 4 | 8 | Germany (1, 2); England (1, 2); Spain (1, 2); Italy (1, 2)   | Across              | 4 (2016 - 2019) | Win ratio; Points; Goals; Ball possession; Shots; Shots on target; Corner kicks; Fouls; Cards; Penalty kicks; Extra time | Yes |
| 2020 / Tilp M; Thaller S                                                      | frontiers in Sports and Active Living / peer-reviewed                             | Covid-19 Has Turned Home Advantage Into Home Disadvantage in the German Soccer Bundesliga                                   | 1 | 1 | Germany (1)                                                  | N/A                 | 2 (2018 - 2019) | Win ratio; Fouls; Cards; Penalty kicks                                                                                   | Yes |
| 2021 / Almeida CH; Leite WS                                                   | Biology of Sport / peer-reviewed                                                  | Professional football in times of COVID-19: did the home advantage effect disappear in European domestic leagues?           | 5 | 5 | Germany (1); Spain (1); England (1); Portugal (1); Italy (1) | Across & Individual | 1 (2019)        | Points; Goals; Shots; Possession; Passes; Aerial Duels; Tackles; Cards                                                   | No  |

|                                                              |                                                                        |                                                                                                                  |    |    |                                                                                                                                                                                                                                               |                     |                 |                                      |     |
|--------------------------------------------------------------|------------------------------------------------------------------------|------------------------------------------------------------------------------------------------------------------|----|----|-----------------------------------------------------------------------------------------------------------------------------------------------------------------------------------------------------------------------------------------------|---------------------|-----------------|--------------------------------------|-----|
| 2021 / Benz LS; Lopez MJ                                     | AstA Advances in Statistical Analysis / peer-reviewed                  | Estimating the change in soccer's home advantage during the Covid-19 pandemic using bivariate Poisson regression | 13 | 17 | Germany (1, 2); Denmark (1); Austria (1); Portugal (1); Greece (1); Spain (1, 2); Turkey (1); Sweden (1); Norway (1); England (1, 2); Italy (1, 2); Switzerland (1); Russia (1)                                                               | Individual          | 5 (2015 - 2019) | Goals; Cards                         | No  |
| 2021 / Bryson A; Dolton P; Reade JJ; Schreyer D; Singleton C | Economics Letters / peer-reviewed                                      | Causal effects of an absent crowd on performances and refereeing decisions during Covid-19                       | 17 | 23 | Albania (1); Australia (1); Austria (1, 2); Costa Rica (1); Denmark (1); England (1, 2); Germany (1, 2, 3); Greece (1); Hungary (1); Italy (1, 2); Poland (1); Portugal (1); Romania (1); Serbia (1); Slovenia (1); Spain (1, 2); Ukraine (1) | Across & Individual | 1 (2019)        | Win ratio; Attendance; Goals, Cards  | No  |
| 2021 / Correia-Oliveira; Andrade-Souza                       | International Journal of Sport and Exercise Psychology / peer-reviewed | Home advantage in soccer after the break due to COVID-19 pandemic: does crowd support matter?                    | 4  | 7  | Germany (1, 2); Spain (1, 2); England (1, 2); Italy (1)                                                                                                                                                                                       | Individual          | 4 (2016 - 2019) | Win ratio; Points; Goals; Attendance | Yes |

|                                       |                                                    |                                                                                                                                                     |   |   |                                                                  |                        |                    |                                                                                                                                                                                                                                                                                                                                     |     |
|---------------------------------------|----------------------------------------------------|-----------------------------------------------------------------------------------------------------------------------------------------------------|---|---|------------------------------------------------------------------|------------------------|--------------------|-------------------------------------------------------------------------------------------------------------------------------------------------------------------------------------------------------------------------------------------------------------------------------------------------------------------------------------|-----|
| 2021 /<br>Ferraresi M;<br>Gucciardi G | Economics Letters<br>/ peer-reviewed               | Who chokes on a<br>penalty kick? Social<br>environment and<br>individual performance<br>during Covid-19 times                                       | 5 | 5 | France (1); Germany<br>(1); Italy (1); Spain (1);<br>England (1) | Across                 | 1 (2019)           | Scored and<br>unscored<br>penalties                                                                                                                                                                                                                                                                                                 | No  |
| 2021 /<br>Fischer K;<br>Haucap J      | Journal of Sports<br>Economics / peer-<br>reviewed | Does Crowd Support<br>Drive the Home<br>Advantage in<br>Professional Soccer?<br>Evidence from German<br>Ghost Games during the<br>COVID-19 Pandemic | 1 | 3 | Germany (1, 2, 3)                                                | Individual             | 4 (2017 -<br>2019) | Win ratio;<br>points; player<br>value; table<br>position; pause<br>(from last<br>match); shape<br>(points earned in<br>last three<br>matches); travel<br>distance;<br>altitude; new<br>coach;<br>matchday;<br>daytime; derby;<br>stadium track,<br>share standing<br>places, capacity;<br>yellow cards,<br>fouls; shots;<br>corners | Yes |
| 2021 / Hill Y;<br>Yperen N            | frontiers in<br>Psychology / peer-<br>reviewed     | Losing the Home Field<br>Advantage When<br>Playing Behind Closed<br>Doors During COVID-19:<br>Change or Chance?                                     | 4 | 4 | Germany (1); Spain<br>(1); England (1); Italy<br>(1)             | Across &<br>Individual | 5 (2015 -<br>2019) | Points; goals;<br>shots;<br>possession;<br>fouls; cards                                                                                                                                                                                                                                                                             | No  |

|                                    |                                                          |                                                                                       |   |   |                                                                                                         |                     |                  |                                                                                                                                                       |     |
|------------------------------------|----------------------------------------------------------|---------------------------------------------------------------------------------------|---|---|---------------------------------------------------------------------------------------------------------|---------------------|------------------|-------------------------------------------------------------------------------------------------------------------------------------------------------|-----|
| 2021 /<br>Konaka E                 | arXiv / not peer-reviewed yet                            | Home advantage of European major football leagues under COVID-19 pandemic             | 4 | 4 | England (1); Germany (1); Italy (1); Spain (1)                                                          | Across & Individual | 10 (2010 - 2019) | Win ratio; Goals                                                                                                                                      | No  |
| 2021 /<br>Leitner MC;<br>Richlan F | frontiers in Sports and Active Living / peer-reviewed    | No Fans - No Pressure: Referees in Professional Football During the COVID-19 Pandemic | 8 | 8 | Spain (1); England (1); Germany (1); Italy (1); Russia (1); Turkey (1); Austria (1); Czech Republic (1) | Across              | 3 (2018 - 2019)  | Win ratio; Fouls; Cards; Cards in the course of the game                                                                                              | Yes |
| 2021 / Link;<br>D; Anzer G         | International Journal of Sports Medicine / peer-reviewed | How the COVID-19 Pandemic has Changed the Game of Soccer                              | 1 | 2 | Germany (1, 2)                                                                                          | N/A                 | 3 (2017 - 2019)  | Win ratio; Goals; Cards; Fouls; Shots; Expected Goals; Ball Possession; Passes; Outplayed Opponents; Pressure; Duels; Running Activity; Contact times | No  |

|                                                               |                                                             |                                                                                                                                         |    |    |                                                                                                                                                                              |                        |                    |                                                                       |     |
|---------------------------------------------------------------|-------------------------------------------------------------|-----------------------------------------------------------------------------------------------------------------------------------------|----|----|------------------------------------------------------------------------------------------------------------------------------------------------------------------------------|------------------------|--------------------|-----------------------------------------------------------------------|-----|
| 2021 /<br>McCarrick D;<br>Bilalic M;<br>Neave N;<br>Wolfson S | Psychology of<br>Sport & Exercise /<br>peer-reviewed        | Home advantage during<br>the Covid-19 pandemic:<br>Analyses of European<br>football leagues                                             | 11 | 15 | England (1, 2);<br>Germany (1, 2); Spain<br>(1, 2); Italy (1, 2);<br>Portugal (1); Greece<br>(1); Turkey (1); Austria<br>(1); Denmark (1);<br>Russia (1); Switzerland<br>(1) | Across                 | 2 (2019)           | Points; Goals,<br>Corners, Shots,<br>Shots on Target,<br>Fouls, Cards | Yes |
| 2021 /<br>Ramchandani<br>G; Millar R                          | Journal of Global<br>Sport<br>Management /<br>peer-reviewed | Investigating the<br>"Twelfth Man" Effect in<br>Five European Domestic<br>Football Leagues: A<br>COVID-19 Induced<br>Natural Experiment | 5  | 5  | England (1); Germany<br>(1); Italy (1); Portugal<br>(1); Spain (1)                                                                                                           | Across &<br>Individual | 2 (2018 -<br>2019) | Win ratio; Points                                                     | No  |
| 2021 /<br>Rovetta A;<br>Abate A                               | Cureus / peer-<br>reviewed                                  | The Impact of Cheering<br>on Sports Performance:<br>Comparison of Serie A<br>Statistics Before and<br>During COVID-19                   | 1  | 1  | Italy (1)                                                                                                                                                                    | N/A                    | 8 (2013 -<br>2020) | Points; Passes;<br>Fouls, Penalties,<br>Cards                         | Yes |

|                                                    |                                                            |                                                                                            |   |   |                                                                                   |                        |                     |                                                                                                                                                                                |     |
|----------------------------------------------------|------------------------------------------------------------|--------------------------------------------------------------------------------------------|---|---|-----------------------------------------------------------------------------------|------------------------|---------------------|--------------------------------------------------------------------------------------------------------------------------------------------------------------------------------|-----|
| 2021 /<br>Sánchez AJ;<br>Lavín JM                  | Soccer & Society /<br>peer-reviewed                        | Home advantage in<br>European soccer<br>without crowd                                      | 5 | 8 | Germany (1, 2); Spain<br>(1, 2); Italy (1, 2);<br>England (1); Austria<br>(1)     | Across &<br>Individual | 1 (2019)            | Points; Goals;<br>Table position;<br>Stadium<br>performance;<br>Number of<br>foreigners;<br>Players'<br>experience;<br>Cards; Budget;<br>Average<br>attendance                 | Yes |
| 2021 /<br>Santana H;<br>Bettega O;<br>Dellagrana R | Science and<br>Medicine in<br>Football / peer-<br>reviewed | An analysis of<br>Bundesliga matches<br>before and after social<br>distancing by COVID-19  | 1 | 1 | Germany (1)                                                                       | N/A                    | 1 (2019)            | Win ratio; Goals;<br>Goal attempts;<br>Possession;<br>Passes; Passes<br>accuracy;<br>Tackles; Corners;<br>Offside; Fouls;<br>Team distance<br>covered;<br>Number of<br>sprints | No  |
| 2021 /<br>Scoppa V                                 | Journal of<br>Economic<br>Psychology / peer-<br>reviewed   | Social pressure in the<br>stadiums: Do agents<br>change behavior<br>without crowd support? | 5 | 9 | Germany (1, 2);<br>England (1, 2); Spain<br>(1, 2); Italy (1, 2);<br>Portugal (1) | Across                 | 10 (2010 -<br>2019) | Points; Goals;<br>Shots; Shots on<br>target; Corners;<br>Fouls; Cards;<br>Penalties; Rest                                                                                      | No  |



|                                                               |                              |                                                                                                                                                                                           |   |    |                                                                                                     |        |                     |                                                                               |     |
|---------------------------------------------------------------|------------------------------|-------------------------------------------------------------------------------------------------------------------------------------------------------------------------------------------|---|----|-----------------------------------------------------------------------------------------------------|--------|---------------------|-------------------------------------------------------------------------------|-----|
| 2021 /<br>Wunderlich<br>F; Weigelt M;<br>Rein R;<br>Memmert D | PLOS ONE / peer-<br>reviewed | How does spectator<br>presence affect<br>football? Home<br>advantage remains in<br>European top-class<br>football matches played<br>without spectators<br>during the COVID-19<br>pandemic | 6 | 11 | Spain (1, 2); England<br>(1, 2); Italy (1, 2);<br>Germany (1, 2, 9);<br>Portugal (1); Turkey<br>(1) | Across | 10 (2010 -<br>2019) | Fouls; Cards;<br>Shots; Shots on<br>target; Goals;<br>Betting odds;<br>Points | Yes |
|---------------------------------------------------------------|------------------------------|-------------------------------------------------------------------------------------------------------------------------------------------------------------------------------------------|---|----|-----------------------------------------------------------------------------------------------------|--------|---------------------|-------------------------------------------------------------------------------|-----|

# Country coefficient: League weighting AFC

60,000

$(1st) \times 0.5 / (2nd) \times 0.25 / (< 2nd) \times 0.1$

$(1st) \times 0.25 / (< 1st) \times 0.1$

$(1st) \times 0.1 / (< 1st) \times 0.05$

$(1st) \times 0.05 / (< 1st) \times 0.025$

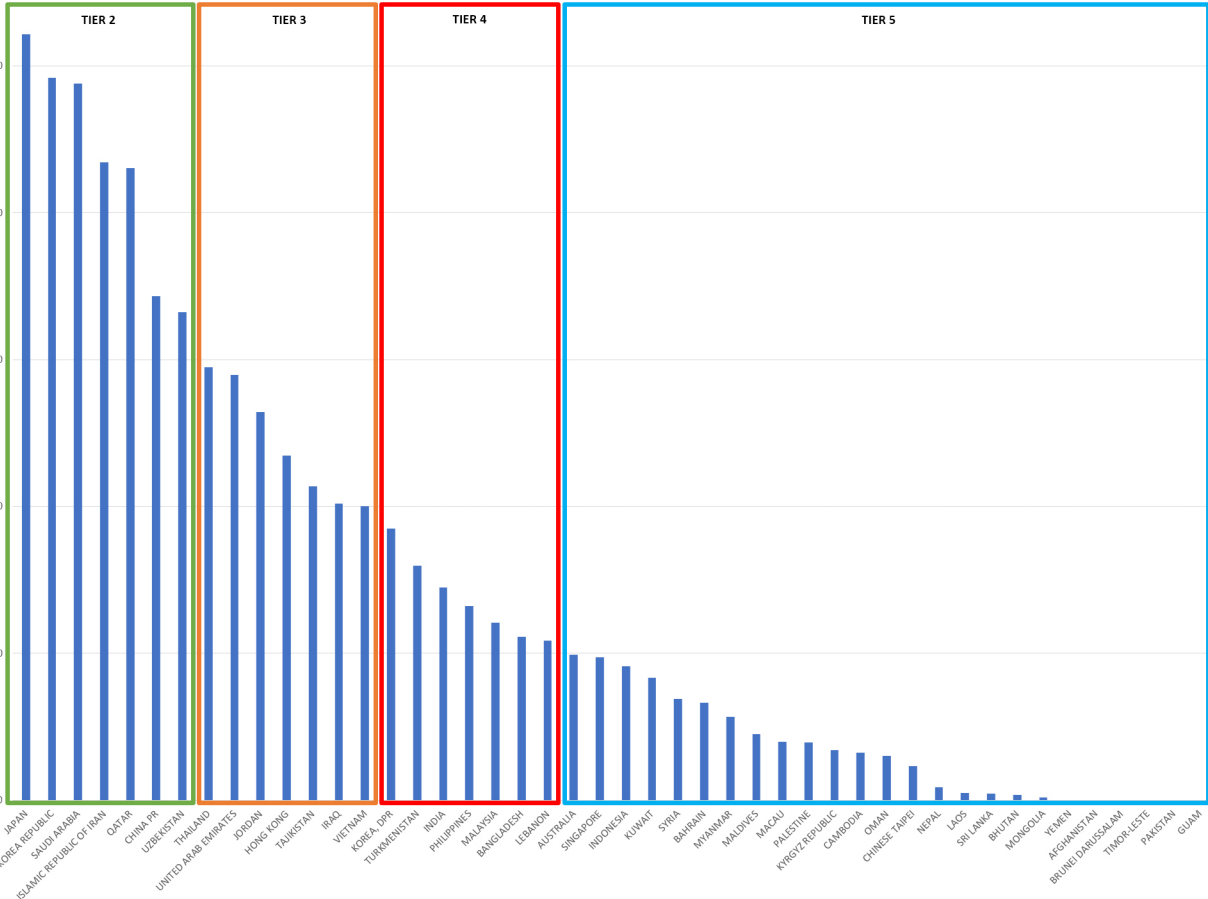

# Country coefficient: League weighting CONCACAF

80,000

$(1st) \times 0.5 / (2nd) \times 0.25 / (< 2nd) \times 0.1$

$(1st) \times 0.25 / (< 1st) \times 0.1$

$(1st) \times 0.1 / (< 1st) \times 0.05$

$(1st) \times 0.05 / (< 1st) \times 0.025$

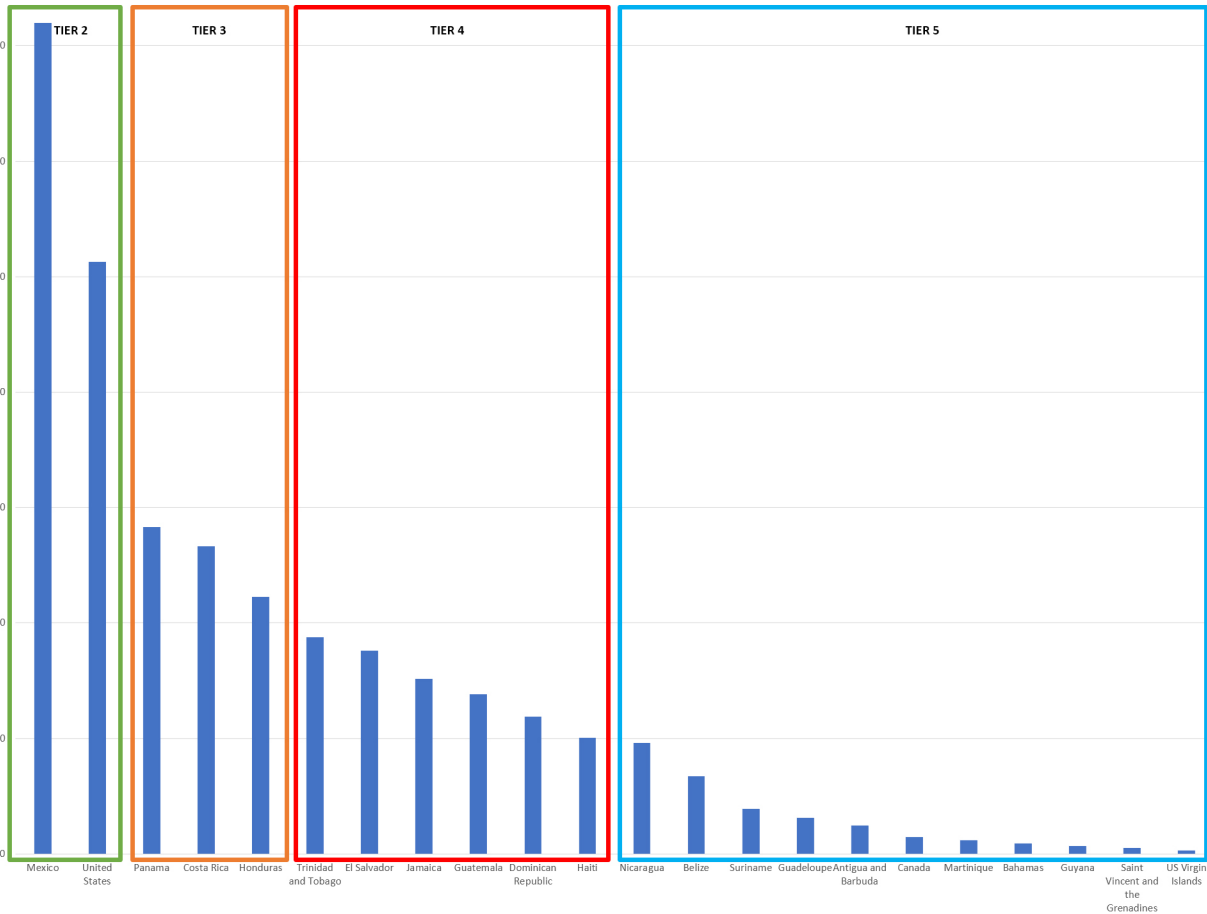

# Country coefficient: League weighting CONMEBOL

60,000

$(1st) \times 0.5 / (2nd) \times 0.25 / (< 2nd) \times 0.1$

$(1st) \times 0.25 / (< 1st) \times 0.1$

$(1st) \times 0.1 / (< 1st) \times 0.05$

$(1st) \times 0.05 / (< 1st) \times 0.025$

**TIER 2**

**TIER 3**

**TIER 4**

**TIER 5**

Brazil

Argentina

Colombia

Paraguay

Ecuador

Uruguay

Chile

Bolivia

Venezuela

Peru

0.000

10,000

20,000

30,000

40,000

50,000

# Country coefficient: League weighting UEFA

100,000

$(1st) \times 0.75 / (2nd) \times 0.5$   
 $/ (3rd) \times 0.25 / (< 3rd) \times 0.1$   
 + 5 Bonus Points

$(1st) \times 0.5 / (2nd) \times 0.25 /$   
 $(< 2nd) \times 0.1$

$(1st) \times 0.25 / (< 1st) \times 0.1$

$(1st) \times 0.1 / (< 1st) \times 0.05$

$(1st) \times 0.05 / (< 1st) \times 0.025$

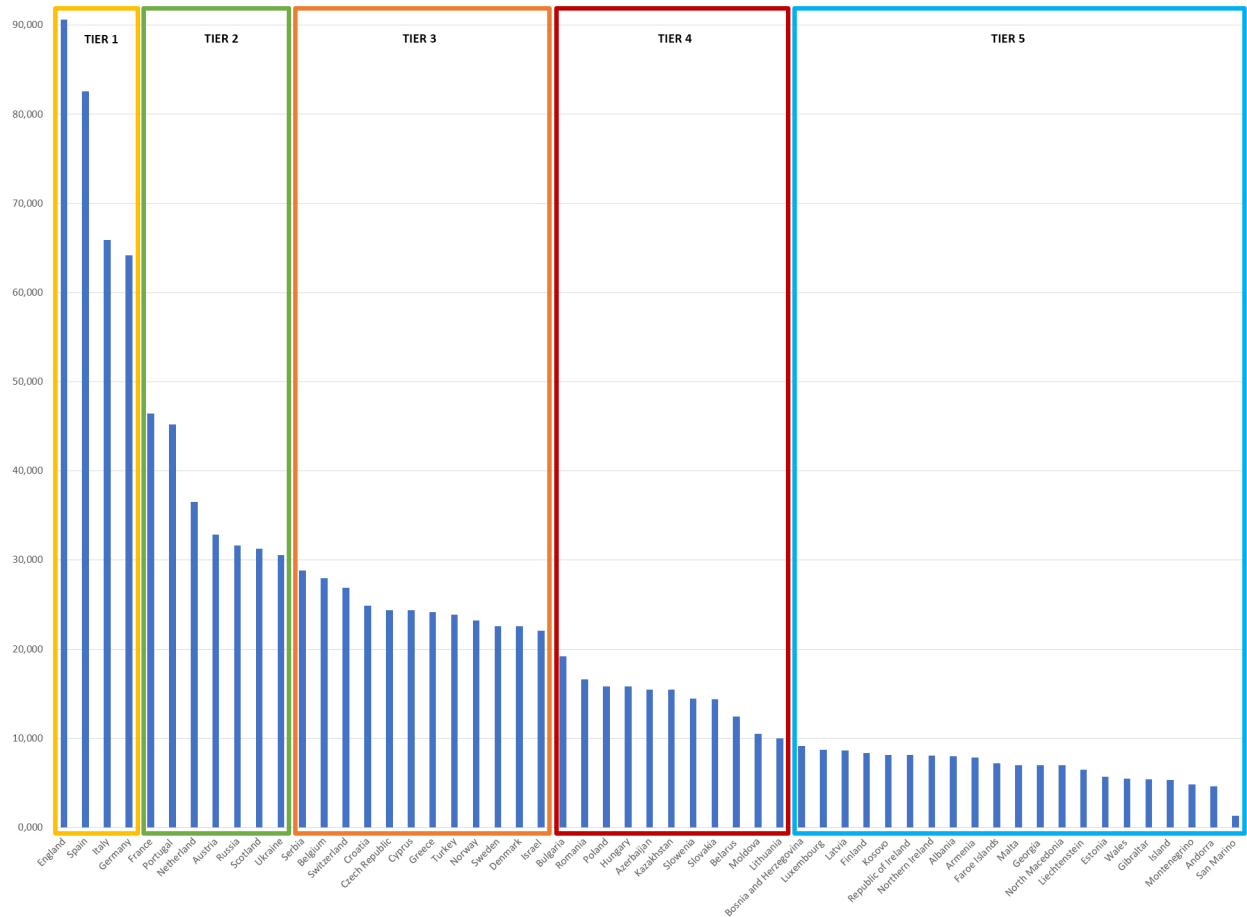

Supplement: MOESM1 [file 20001962]
